# Supplementary material for: Hypoxia Induces Trimethylated H3 Lysine 4 by Inhibition of JARID1A Demethylase
Source: Oxford University Press journal article supplement (doi:10.1158/0008-5472.can-09-2942), 2010-04-20
Supplement: 00085472can092942-sup-stab_2.xls [file 00085472can092942-sup-stab_2.xls]

## Sheet: Sheet1
Supplementary Table 2
accession	Name	peak_score(Fold to control)
NM_017423	GALNT7	5.01896
AI452595	LOC389129	3.88382
AL136680	GBP3	3.55777
AW150913	SEPT6	3.45724
AA788711	COL1A2	3.38832
N98595	PRICKLE1	3.35841
NM_002705	PPL	3.2618
NM_002133	HMOX1	3.12795
AB000812	ARNTL	3.08212
NM_000574	DAF	3.07105
AI927931	OMA1	2.97316
NM_022726	ELOVL4	2.96001
AA173223	FLJ37927	2.87738
NM_018287	ARHGAP12	2.8439
AK021850	ZNF395 ; FBXO16	2.75955
AK023825	C21orf91	2.70338
AW194947	ENPP4	2.64777
NM_015216	KIAA0433	2.64585
AI632728		2.60582
BE271644	C10orf54	2.55859
NM_022470	WIG1	2.55844
U36189	C5orf13	2.55403
BE620297	TMED5	2.55184
AI761561	HK2	2.55037
AF153330	SLC19A2	2.53268
AI761597	SLC30A7	2.51357
NM_018439	IMPACT	2.5008
AF495383	ADAM9	2.48722
AW182455	SFXN4	2.45295
AA528157	COQ6	2.44091
H48840	FXR1	2.42255
AB018283	RHOBTB1	2.37919
AI672159		2.32854
NM_021820	C6orf75	2.32348
D86962	GRB10	2.31903
AI004375	FLJ31842	2.31807
NM_171846	LACTB	2.31674
NM_018660	ZNF395	2.30649
AI949179	BCL2L11	2.29203
AW293531	NMT2	2.2862
AB038950	ALS2CR2	2.27509
AF161522	C3orf4	2.2735
N36085		2.25568
W68084	EGFL5	2.25502
W58461	PRO0149	2.25396
AI927931	DAB1 ; OMA1	2.25155
NM_014034	ASF1A	2.24405
AI452715	ZNF608	2.2131
AK024246	TULP3	2.20857
BE999972	SGPL1	2.20683
BF197357	CCT5	2.19821
AB020707	WASF3	2.19386
NM_003645	SLC27A2	2.1864
AL117566	UBE1C	2.17649
NM_016629	TNFRSF21	2.17242
AW207699	TMOD2	2.16638
NM_015396	ARMC8	2.16194
AI160339	SRPRB	2.15954
AK021539	C18orf4	2.15793
AI743621	COL1A1	2.13006
AI040343	SCLY ; NCE2	2.12956
AL575509	ETS2	2.11956
AU152505	MAPK8	2.11013
AA044726	C10orf46	2.11002
NM_006472	TXNIP	2.10996
U24267	ALDH4A1	2.10615
BF246115	MT1F	2.10362
AA928542	LOC91137	2.09251
AU150943	C10orf38	2.09182
D50911	VGLL4	2.08651
AI188161		2.07767
AA579630	C10orf42	2.07749
NM_007282	RNF13	2.0767
AA583986	CPSF2	2.06337
NM_016098	BRP44L	2.0598
D31885	ARL6IP	2.05686
NM_002841	PTPRG	2.05213
NM_002971	SATB1	2.02937
U26710	CBLB	2.01855
U49262	DVL3	2.00964
NM_003877	SOCS2	2.00567
NM_006090	CEPT1	1.9837
AB032983	PPM1H	1.97463
BC011011	UEV3	1.95864
AI742358	DKFZp313A2432	1.95697
AW772123	PPP2R5C	1.92379
AF160967	KCNMB4	1.91831
AI928403	AGPAT3	1.88969
NM_173674	DCBLD1	1.83167
AL832613	MGC9564	1.81044
AI095270	ITCH	1.81043
