# Supplementary material for: Hypoxia Induces Trimethylated H3 Lysine 4 by Inhibition of JARID1A Demethylase
Source: Oxford University Press journal article supplement (doi:10.1158/0008-5472.can-09-2942), 2010-04-20
Supplement: 00085472can092942-sup-stab_3.xls [file 00085472can092942-sup-stab_3.xls]

## Sheet: Sheet1
Supplementary Table 3
accession	Name	peak_score(Fold to control)
NM_004418	DUSP2	0.133294
NM_005056	JARID1A	0.134496
NM_005159	ACTC	0.161221
AI991459	DOCK2	0.164504
AI812030	THBS1	0.167986
BC012486	KRTAP2-1 ; KRTAP2-4	0.169723
AW058622	WASPIP	0.184419
BF060747	LOC130576	0.186508
BF593817	SFXN1	0.196164
BE971383	SAT	0.206697
BC008688	ZNF85	0.214678
NM_004267	CHST2	0.215919
BC000658	STC2	0.226724
NM_004404	SEPT2	0.230104
NM_002006	FGF2	0.231419
AF220032	TRIM7	0.232166
BC003143	DUSP6	0.240229
M31159	IGFBP3	0.24313
AL080111	NEK7	0.243955
BG288115	TMEM65	0.245824
D13891	ID2 ; ID2B	0.245838
AI743557	RBM16	0.250324
AV705516	G3BP	0.255025
N95440		0.259312
M73554	CCND1	0.263437
AW972292	C6orf62	0.263932
NM_002997	SDC1	0.264476
AL050204		0.26612
BC015429		0.270947
NM_014391	ANKRD1	0.271155
M33663	PSG1	0.27241
AI582192	TMEM57 ; LOC159090	0.273598
BC015940	NT5E	0.274144
AW162210	LOC399959	0.277512
AF151047	C14orf100	0.277965
AA020784	UCHL5	0.282195
AK023520	CBX5	0.283505
NM_002256	KISS1	0.285023
AA194149	RAPH1	0.288722
BF433902	TNFRSF11B	0.289065
NM_002575	SERPINB2	0.292265
BF060791	ETV5	0.292918
NM_031246	PSG2	0.29603
AV724329	PGM2L1	0.299477
AI953847	IBRDC2	0.30146
AK001710	SSX2IP	0.301643
AI344311	PLDN	0.302641
H10545	RBMS3	0.302816
R94644	CSPG2	0.305241
BC011549	ATP5S	0.306099
BG249599	TGOLN2	0.306789
BC014155	RHEBL1	0.307571
AU158022	ARHGAP18	0.308125
AF004711	KCNK2	0.309435
AI348001	LOC159090	0.311933
NM_002522	NPTX1	0.315
BE326381	KLHL23	0.318288
AI110886	PAPPA	0.318675
BG327863	CD24	0.319038
NM_001785	CDA	0.319766
N30645	BIRC4	0.321059
NM_014171	CRIPT	0.321258
AF101051	CLDN1	0.322449
NM_002924	RGS7	0.322824
BG110811	LOC340061	0.323324
NM_014903	NAV3	0.323995
AL049383	ROCK2	0.324537
AI457436	BMPR2	0.328582
NM_024590	ARSJ	0.329128
AL031781	QKI	0.329558
NM_030915	LBH	0.329686
NM_013229	APAF1	0.331104
M33653	COL13A1	0.333577
AI823986	MCFP	0.335059
BE617588	HPCAL1	0.336295
AW182575	IKIP	0.339429
NM_024907	FBXO17	0.339871
NM_002999	SDC4	0.34334
NM_018004	TMEM45A	0.345006
BG283995	THOC1	0.346238
BG109249		0.346366
BC005357	EFCAB2	0.349665
BC000433	MAPK13	0.349894
AI927919	STS-1	0.350073
AI655642	NDFIP2	0.350613
S69738	CCL2	0.351414
N30169	PSG5	0.351464
NM_020199	C5orf15	0.354495
NM_003304	TRPC1	0.354573
NM_033136	FGF1	0.355071
U90030	BICD1	0.357482
AI633618		0.357565
BE674006		0.358249
AI150000		0.359168
NM_016270	KLF2	0.360201
BC005997	C1orf97	0.364037
NM_018370	FLJ11259	0.364787
AK001007		0.366285
AK023795	ADAMTS1	0.366739
BF431973	ZNF397	0.368002
BF511003	C14orf149	0.368064
BG169832	AK5	0.369274
AF329088	OSAP	0.372115
BF114967	AKAP12	0.372197
BF674349	WWTR1	0.372513
AL359062	COL8A1	0.37288
BF793951	AZIN1	0.37439
AK025986	LOC51315	0.376162
NM_006255	PRKCH	0.376483
NM_000854	GSTT2	0.376651
BE328850	LOC116238	0.377575
BF439316	TMEFF1	0.378086
NM_016551	TM7SF3	0.37832
BC006128	MGC13040	0.378371
AF278532	NTN4	0.378993
AW779917		0.380171
AI198515		0.380781
AA729232		0.381334
NM_002608	PDGFB	0.383692
BE467087		0.383916
AI884906	RNF182	0.384272
AI692645	DOCK5	0.386361
AB040927	SH3MD2	0.386617
NM_018221	MOBK1B	0.386757
AA046941	FARP2	0.386804
AL513639	SLC35B4	0.387657
NM_018039	JMJD2D	0.388196
BE904551	CASC4	0.388698
AK021804		0.388812
AL036840	FUBP1	0.38941
NM_002276	KRT19	0.389543
BC029828	GALGT	0.390319
NM_022817	PER2	0.391019
AW294869	SKIL	0.392526
NM_002782	PSG6	0.392895
BF060783	DLX1	0.392905
NM_023915	GPR87	0.393362
NM_004124	GMFB	0.394069
U17714	ST13	0.396035
NM_030567	PRR7	0.399274
AW007160	ZC3H12B	0.399524
AI816281	MGC48625	0.399623
NM_021178	CCNB1IP1	0.40074
BE856336	C8orf13	0.401906
AI991160	MYO5B	0.402754
N63551	MLSTD2	0.403098
NM_000361	THBD	0.40366
NM_001769	CD9	0.403854
AA843541		0.404381
AI951144		0.404455
NM_002780	PSG4	0.405127
NM_003800	RNGTT	0.405922
AL117461	YIPF6	0.406228
BE671949	RG9MTD2	0.408298
AV707506	FLJ37562	0.408626
NM_016354	SLCO4A1	0.410237
BG107203	RABGAP1L	0.410773
AW971198	NS3TP2	0.410779
BC012379	C8orf76	0.411074
NM_002506	NGFB	0.413243
AA745954	AXIN1	0.415009
AA628398	STARD4	0.415037
NM_005627	SGK	0.416019
AA227842	MGC52057	0.416373
BC033667	LOC90246	0.416591
NM_025147	FLJ13448	0.416747
H90656	NMNAT2	0.416875
AK026921	SLC17A5	0.41707
H99792		0.417829
NM_020037	ABCC3	0.418203
AB007896	PREPL	0.418364
AK001166	DEPDC1B	0.419448
BE047452	ELAVL1	0.420734
AF097159	B4GALT6	0.421346
L10374		0.421744
BF679966	FLJ38426	0.422754
AA721025		0.423097
AF220023	TRIM4	0.423261
NM_000097	CPOX	0.42496
AI950069	TFDP1	0.426731
NM_015344	LEPROTL1	0.427587
AA046411	APPBP2	0.427807
AI199072	MGC70857	0.428679
AW305300		0.430134
AI244661	MPP7	0.431354
AI672432	LOC285193	0.432323
NM_021972	SPHK1	0.432566
N32051	ANKRD28	0.432956
BE542684	EIF1AX	0.43368
AW274874		0.434247
NM_016823	CRK	0.43572
AW299507	GGPS1	0.436144
AA463626	WNT3	0.436254
AB014540	SWAP70	0.43665
BC021861	LOC554202	0.437586
NM_002166	ID2	0.438496
BE551416	ALPK2	0.438665
AL135396	FAM72A	0.438774
NM_004052	BNIP3	0.438777
AF070528	MALT1	0.438962
AI478771	ZNF148	0.439887
BE500942		0.440826
AI676056	STYXL1	0.441655
AL136139	NEDD9	0.441918
AL037414	C6orf148	0.444344
AI638279	BRWD1	0.44443
AI984803	KIF9	0.444556
NM_005397	PODXL	0.446632
H40696		0.446698
NM_001562	IL18	0.446882
AU146237	SFRS11	0.446987
AK026857	MRPL17	0.447493
BF034206	LOC339745	0.448098
AW083576	CCL28	0.448638
NM_001553	IGFBP7	0.449006
AL521959	PSCD3	0.449305
BE464799		0.449616
AL080220	DKFZP586P0123	0.450201
AA825721		0.451642
AU134977	TncRNA	0.451811
AW962413		0.452075
NM_014686	KIAA0355	0.452416
NM_014948	UBOX5	0.453454
NM_007034	DNAJB4	0.454503
AI961231	TOX	0.457746
AL565362	SLC2A13 ; FLJ40126	0.459272
NM_005978	S100A2	0.459814
AI498207	KIAA1245 ; LOC200030 ; MGC8902	0.459883
AK055438	TM6SF1	0.461425
AI758919	C18orf37	0.461631
AU145049	HIP1	0.461659
NM_000505	F12	0.461979
AI160126		0.46219
AW827204		0.462643
AI912351	NOL3	0.463466
AA826324	RASEF	0.465233
AI982758		0.465689
W88821	IFRG15	0.466104
AI983837	PPP4R2	0.466614
BE672045	MGC10233	0.467316
AI796536		0.468371
AF241785	KIAA1128	0.46846
AI659180	TSN	0.469662
AW193693	C2orf32	0.469854
BE502264	SPA17	0.470283
AF054589	MDFIC	0.471872
BE964704	AP4E1	0.47229
NM_016109	ANGPTL4	0.473731
AC004010	AMIGO2	0.474923
NM_018191	RCBTB1	0.475093
NM_014288	ITGB3BP	0.475711
AI760760	SMARCA3	0.475814
BF216535	NPHP1	0.476765
BF432648	TNFRSF19	0.478456
AJ011712	TNNT1	0.478646
AL049452	LOC144874	0.478866
BE622627	PIK3R3	0.47934
W46994		0.479358
BE222709	MFAP3	0.480314
AK025909		0.481261
M69148	MDK	0.482582
AI446414	KITLG	0.482597
AW152589	BCAP29	0.48335
AL519376	NAPG	0.484625
NM_004105	EFEMP1	0.484711
U36190	CRIP2	0.485999
BF514509		0.48606
AF052151	FAM89B	0.48695
AI871356	LOC284804	0.48698
AA453163	PCMTD1	0.487834
AL524175	LOC116064	0.488491
NM_002555	SLC22A18	0.489481
AA642341	KIAA1333	0.490646
AA100793	LMO7	0.4909
AI770166	WHSC1	0.491313
AI150690		0.492754
AI093722		0.493414
NM_173487	LOC132321	0.494563
NM_000050	ASS	0.496233
NM_001855	COL15A1	0.497574
BC000329	SFN	0.498337
AI079596	FREQ	0.498513
L41690	TRADD	0.499991
AF286162	PLEKHA3	0.500093
AI566130	AK3	0.502789
BC005400	FKSG14	0.50686
BF130943	PPAPDC1A	0.511733
NM_005461	MAFB	0.512411
AF001540	MALAT1	0.516764
AI675336		0.518171
AL136599	SENP7	0.531789
