# Supplementary figures and images for: Hypoxia Induces Trimethylated H3 Lysine 4 by Inhibition of JARID1A Demethylase
Source: Oxford University Press journal article supplement (doi:10.1158/0008-5472.can-09-2942), 2010-04-20

# Supplementary Figure 1

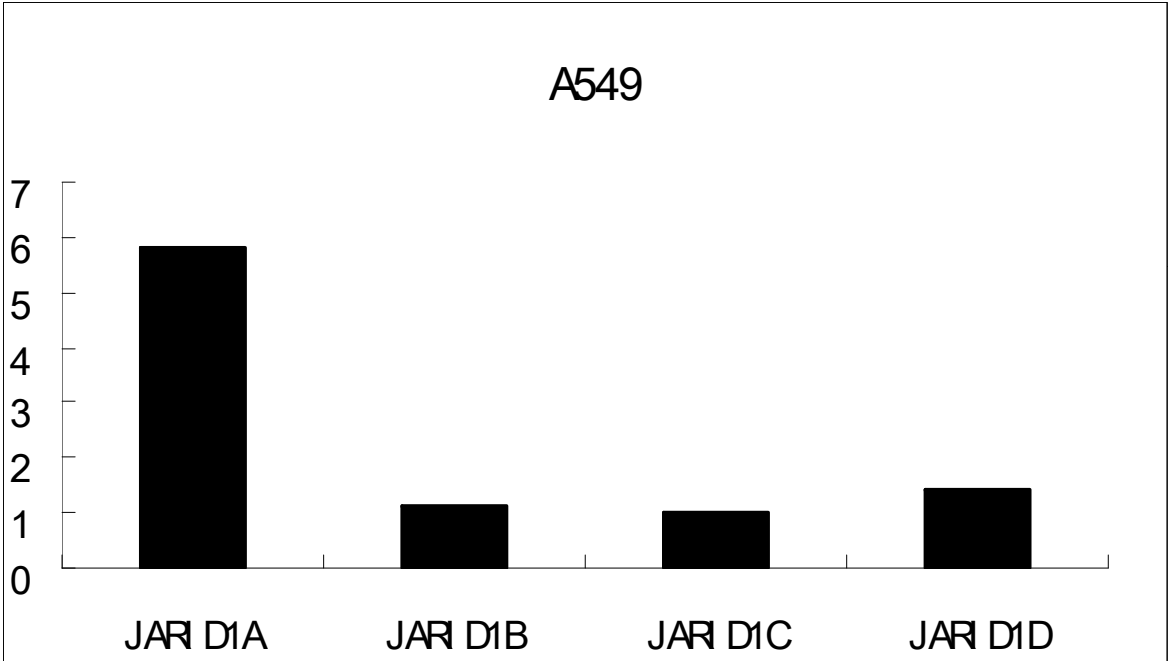

## Supplementary Figure 2

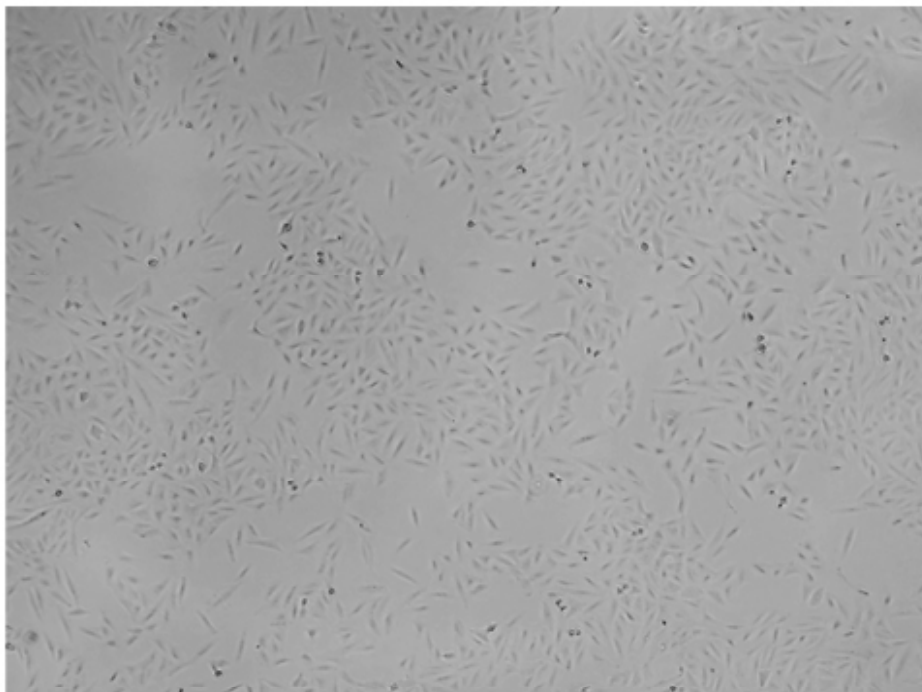

A549

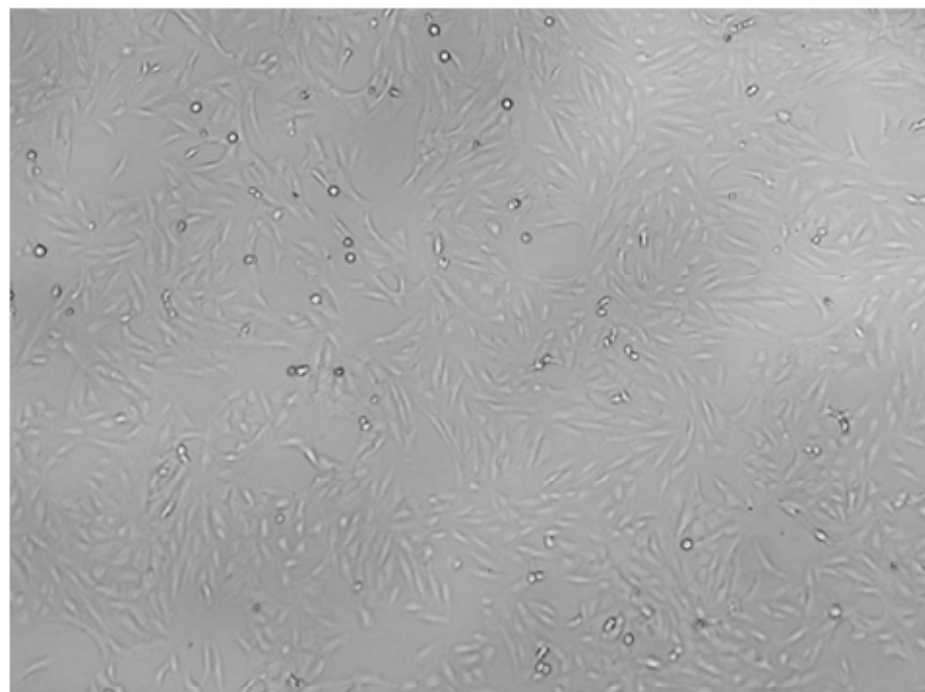

Beas-2B

Supplement: 00085472can092942-sup-sfig_1.pdf [file 00085472can092942-sup-sfig_1.pdf]
